# Supplementary material for: Australian treatment outcome study: protocol for the 18–20-year follow-up of a prospective longitudinal cohort examining the natural history of heroin dependence and associated mortality, psychiatric and physical health, and health service use
Source: PubMed Central journal article supplement — BMJ Open. 2020 Jul 12;10(7):e039226. doi: 10.1136/bmjopen-2020-039226 (PMC7359069; doi:10.1136/bmjopen-2020-039226), 2020-07-12
Supplement: bmjopen-2020-039226.reviewer_comments.pdf [file bmjopen-2020-039226.reviewer_comments.pdf]

## PEER REVIEW HISTORY

BMJ Open publishes all reviews undertaken for accepted manuscripts. Reviewers are asked to complete a checklist review form (<http://bmjopen.bmj.com/site/about/resources/checklist.pdf>) and are provided with free text boxes to elaborate on their assessment. These free text comments are reproduced below.

## ARTICLE DETAILS

|                            |                                                                                                                                                                                                                                                     |
|----------------------------|-----------------------------------------------------------------------------------------------------------------------------------------------------------------------------------------------------------------------------------------------------|
| <b>TITLE (PROVISIONAL)</b> | Australian Treatment Outcome Study: Protocol for the 18-20-year follow-up of a prospective longitudinal cohort examining the natural history of heroin dependence and associated mortality, psychiatric and physical health, and health service use |
| <b>AUTHORS</b>             | Marel, Christina; Mills, Katherine; Visontay, Rachel; Wilson, Jack; Darke, Shane; Ross, Joanne; Slade, Tim; Haber, Paul; Haasnoot, Katherine; Keaveny, Madeleine; Tremonti, Chris; Teesson, Maree                                                   |

This article was not externally reviewed at BMJ Open. Protocols that have been independently assessed prior to submission to BMJ Open are usually fast-tracked to publication on the grounds that further substantial changes will not be possible. This independent assessment will usually be external, independent review for both a substantial grant award from a non-commercial or government funder and ethics approval.
